# Supplementary material
Source: publisher figshare collection journal article supplement (https://gsapubs.figshare.com/ndownloader/files/22747532)
Supplement: Supplementary file 1 [file 22747532]

Sedimentology and hydrodynamic implications of a coarse grained hurricane sequence in a carbonate reef setting.

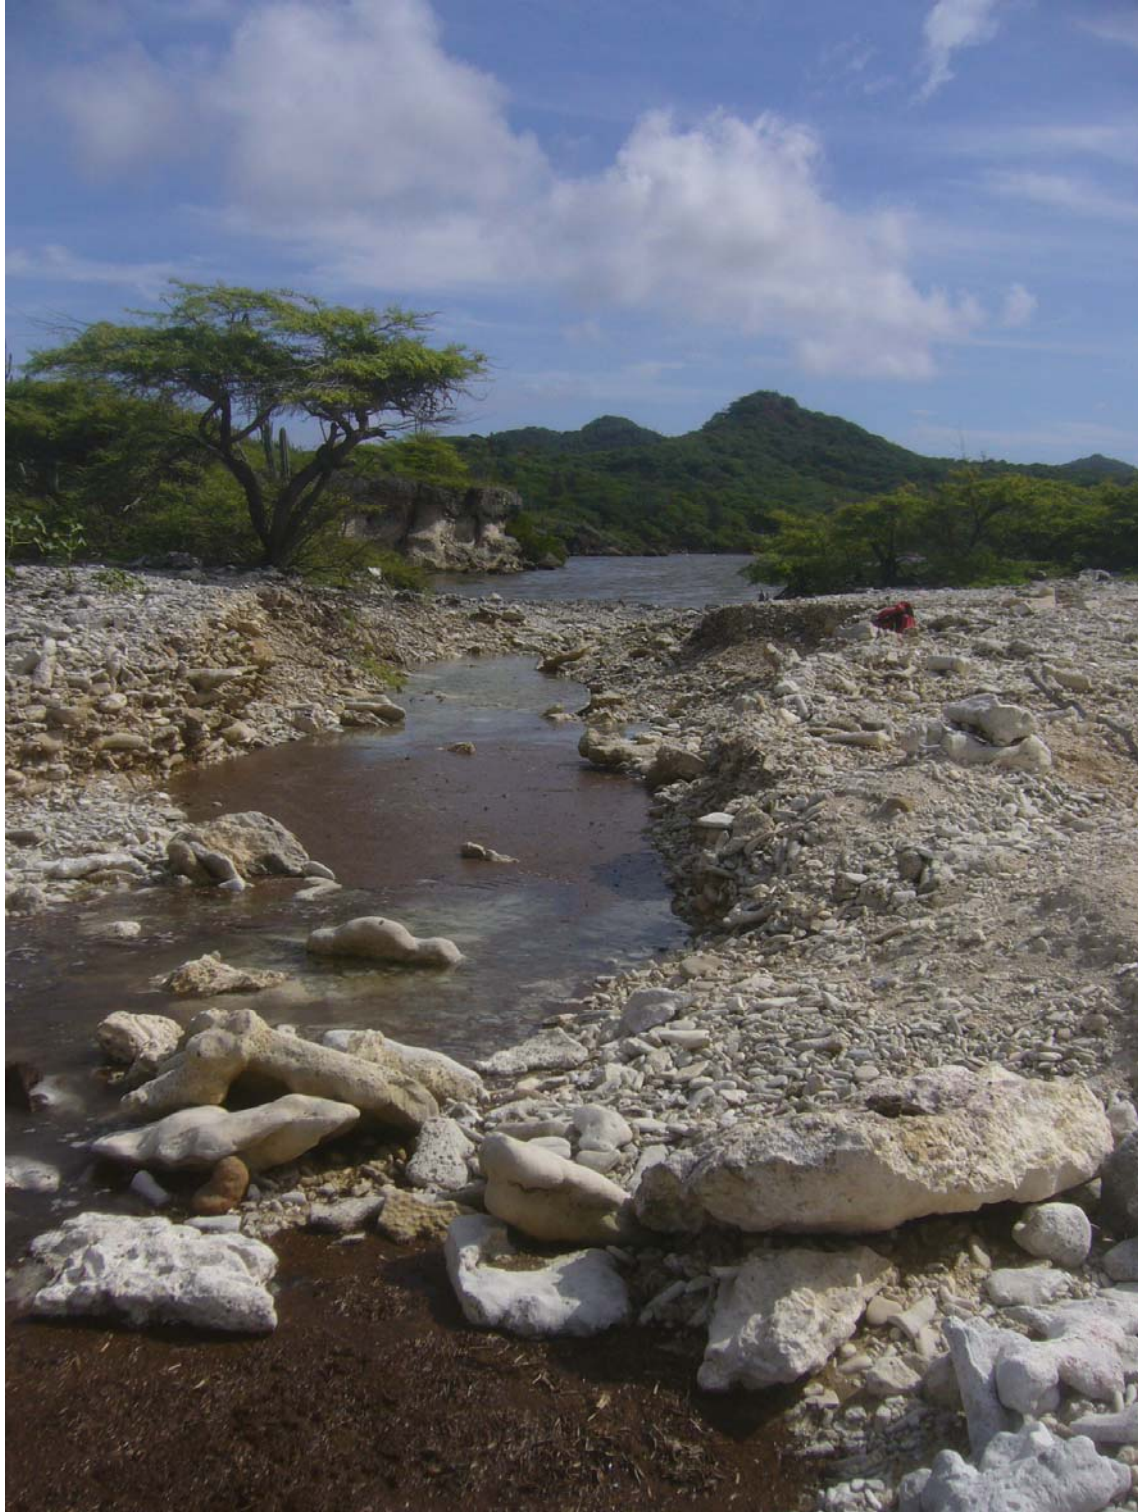

**Figure DR1.** Overview of the outcrop on Playa Funchi shown from West to East. Salina Funchi is located in the background.



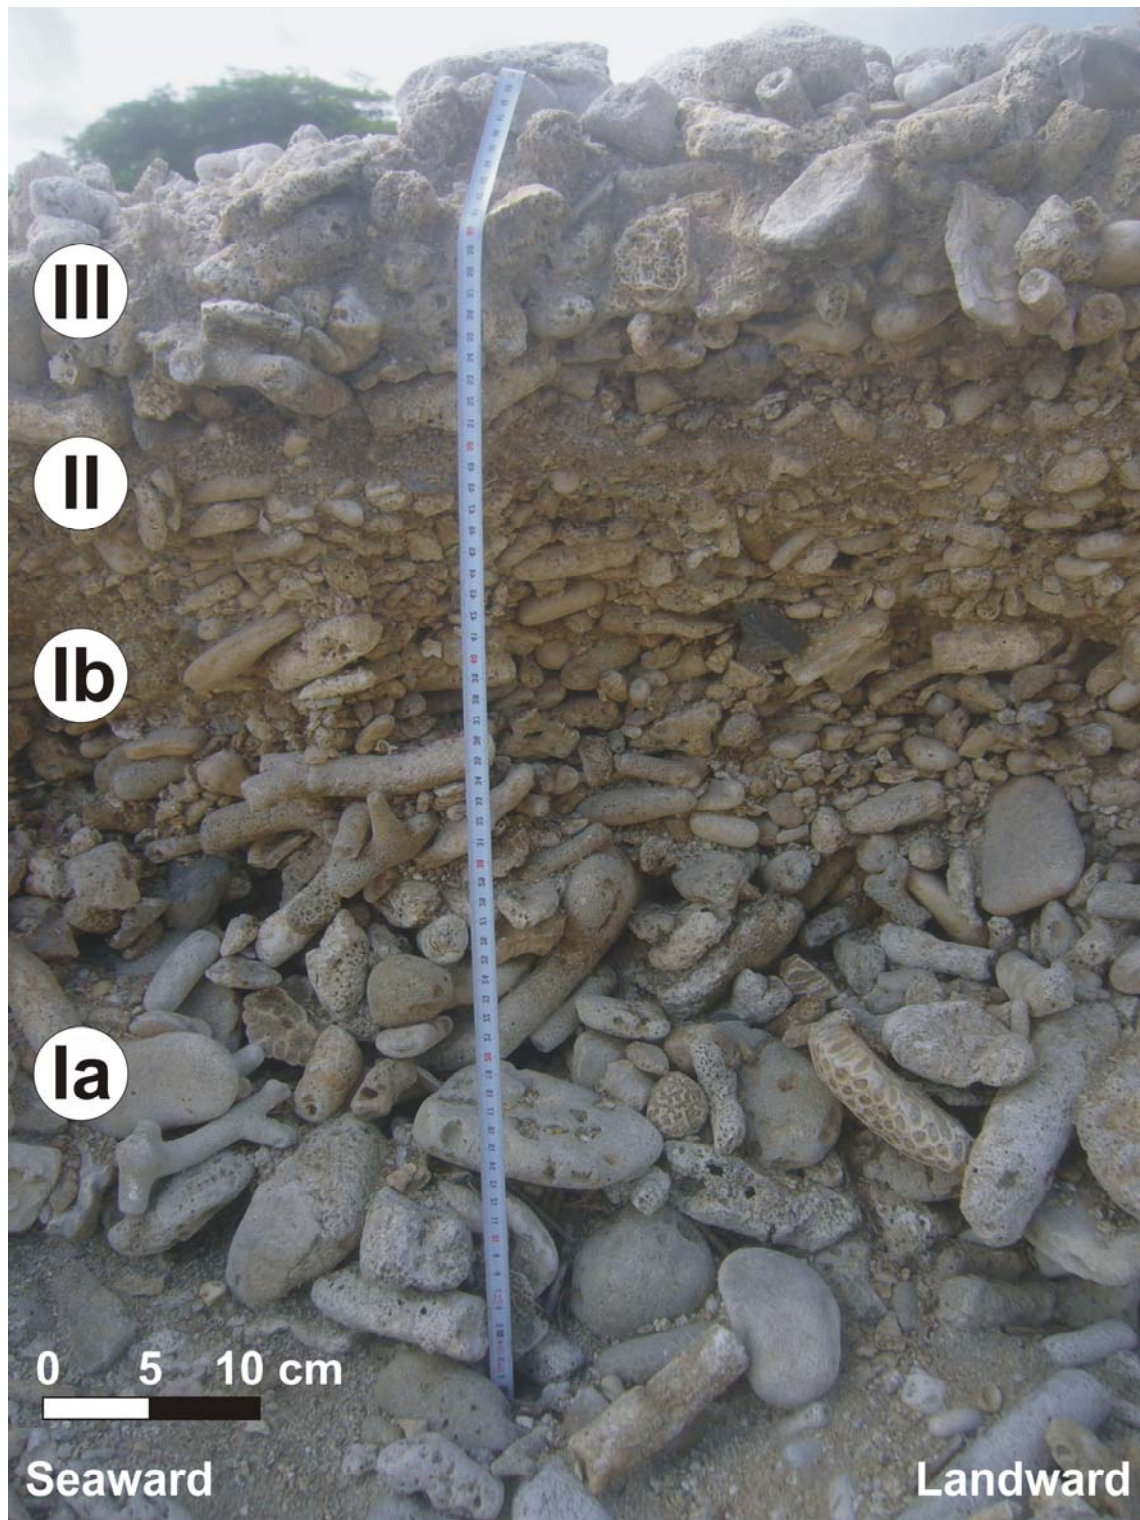

**Figure DR2.** High resolution image of the four sedimentary units at Playa Funchi.

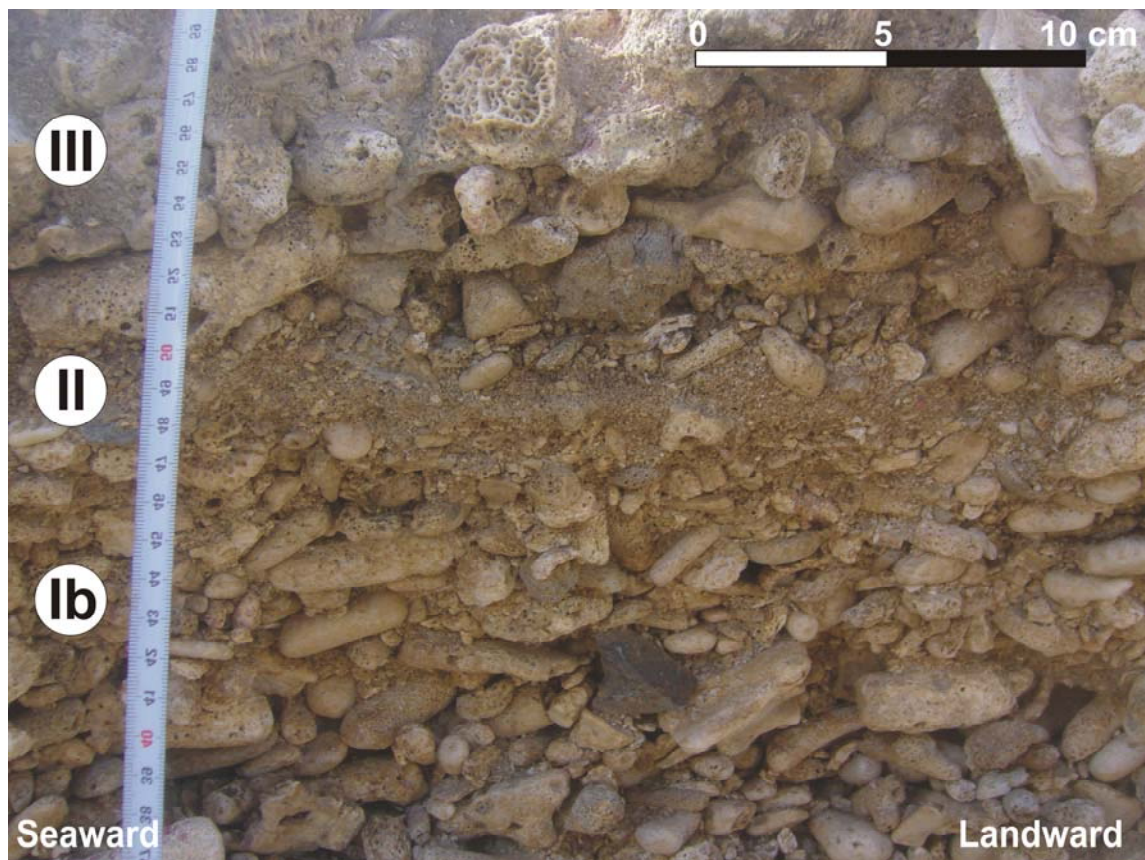

**Figure DR3.** Close up picture of unit II.
